# Supplementary material for: The impact of RNA extraction method on accurate RNA sequencing from formalin-fixed paraffin-embedded tissues
Source: BMC Cancer. 2019 Dec 5;19:1189. doi: 10.1186/s12885-019-6363-0 (PMC6896723; doi:10.1186/s12885-019-6363-0)
Supplement: Supplementary file 9 — Additional file 9: Table S4. Summary of concordance and LME analysis for molecular signatures on wtRNAseq data. [file 12885_2019_6363_MOESM9_ESM.xlsx]

## Sheet: Table S3
Table S4 Summary of concordance and LME analysis for molecular signatures on wtRNAseq
Signature	Kit	Concordance analysis			LME
		CCC (95% CI)	R	Bias	Bias	Variance
endoPredict	N	0.912 (0.733-0.976)	0.932	0.979	-0.786	1.886
	Q	0.925 (0.774-0.977)	0.941	0.984	-0.581	1.584
	R	0.914 (0.749, 0.972)	0.947	0.965	-1	1.432
Recurrence score	N	0.496 (0.105-0.755)	0.712	0.697	-22.4	349.7
	Q	0.494 (0.126-0.743)	0.749	0.66	-24	281.8
	R	0.559 (0.204-0.784)	0.81	0.691	-23.6	267.7
SET ER/PR	N	0.934 (0.820-0.977)	0.975	0.958	-0.193	0.027
	Q	0.925 (0.790-0.975)	0.965	0.959	-0.211	0.027
	R	0.930 (0.801-0.977)	0.964	0.965	-0.21	0.03
For each signature, the best value was highlighted in bold
